# Supplementary material for: HDP2: a ribosomal DNA (NTS-ETS) sequence as a target for species-specific molecular diagnosis of intestinal taeniasis in humans
Source: PubMed Central journal article supplement (PMC6389257; doi:10.1186/s13071-018-2646-6), 2018-02-27
Supplement: 13071_2018_2646_MOESM1_ESM.pdf [file 13071_2018_2646_MOESM1_ESM.pdf]

**Additional file 1: Table S1. DNA markers and molecular protocols used to identify the taeniid species involved in human taeniasis.**

| DNA type       | DNA marker                                     | Molecular protocols<br>(DNA Hybridization,<br>RFLP, PCRs,<br>Sequencing, LAMP...) | Samples/<br>Sensitivity (Detection limit for<br>gDNA, sensitivity for taeniasis<br>carriers diagnosis) and Specificity | Species Identification           | Reference |
|----------------|------------------------------------------------|-----------------------------------------------------------------------------------|------------------------------------------------------------------------------------------------------------------------|----------------------------------|-----------|
| rDNA           | pTS10                                          | DNA Hybridization                                                                 | gDNA: 100 ng                                                                                                           | T.sol                            | [1,2]     |
| nDNA           | HDP1: highly<br>repetive<br>HDP2: repetitive   | DNA Hybridization                                                                 | HDP1, gDNA: 3 ng<br>HDP2, gDNA: 3 ng/25 ng                                                                             | HDP1: T.sag<br>HDP2: T.sag/T.sol | [3]       |
| rDNA           | pTTr 3.1 and pTSgr<br>3.1, pTSgr 2.4           | PCR                                                                               | gDNA: 500 ng                                                                                                           | TaiwanT-T.sag                    | [4]       |
| rDNA, mtDNA    | 28S rRNA , ITS1-<br>rRNA, CO1                  | Sequencing and<br>PCR/RFLP                                                        | –                                                                                                                      | T.sol-T.sag-Asian Taenia         | [5]       |
| nDNA,<br>mtDNA | Highly repetitive<br>DNA (pTSol9,<br>pTsag-16) | DNA Hybridization                                                                 | gDNA: 50-100 ng; eggs: 1-50,<br>gDNA: 100-150 ng                                                                       | pTSol9: T.sol<br>pTsag-16: Tsag  | [6]       |
| mtDNA          | 12S rDNA                                       | PCR/Sequencing                                                                    | 200-800 ng                                                                                                             | T.sol-T.sag and other taeniids   | [7]       |
| nDNA           | HDP1, HDP2                                     | HDP1 PCR<br>Mx-HDP2 PCR                                                           | gDNA: < 10 pg<br>gDNA: 10 pg                                                                                           | HDP1: T.sag<br>HDP2: T.sag-T.sol | [8,9]     |
| rDNA           | 5.8S and ITSs rRNA                             | PCR-REA<br>(PCR/RFLP)                                                             | gDNA: 100 ng                                                                                                           | T.sol-T.sag                      | [10]      |
| mtDNA          | CO1 and CYTb                                   | PCR/Seq                                                                           | –                                                                                                                      | T.sol genotypes                  | [11,12]   |
| mtDNA          | CO1 and CYTb                                   | (PCR-BESS T Base<br>analysis)                                                     | –                                                                                                                      | T.sag-T.asia-T.sol genotypes     | [13]      |
| mtDNA          | 12S rDNA                                       | PCR/RFLP                                                                          | –                                                                                                                      | T.sag-T.sol                      | [14]      |
| mtDNA          | CO1                                            | PCR/RFLP                                                                          | --                                                                                                                     | T.sag-T.asia-T.sol genotypes     | [15]      |
| nDNA           | HDP2                                           | Mx-HDP2 PCR<br>Sn-HDP2 PCR                                                        | Feces: 4375 eggs/2g stool sediment<br>137 eggs /2g stool sediment                                                      | T.sag                            | [16]      |

**Additional file 1: Table S1. DNA markers and molecular protocols used to identify the taeniid species involved in human taeniasis.**

|             |                                                |                                                            |                                                                                                                               |                                                                  |      |
|-------------|------------------------------------------------|------------------------------------------------------------|-------------------------------------------------------------------------------------------------------------------------------|------------------------------------------------------------------|------|
| nDNA        | HDP2                                           | HDP2 PCR/RFLP<br>Mx-HDP2 PCR                               | gDNA: 10 ng                                                                                                                   | T.sag-T.asia                                                     | [17] |
| mtDNA       | CO1                                            | Multiplex/ nested PCR                                      | Feces: 50 eggs/g feces                                                                                                        | T.sag-T.asia-T.sol genotypes                                     | [18] |
| mtDNA       | CO1                                            | PCR/RFLP                                                   | Feces: 34 eggs/2g stool sediment                                                                                              | T.sag-T.sol                                                      | [19] |
| nDNA        | Tso31                                          | Nested PCR                                                 | Feces: 10 eggs/250 mg (40 eggs/g)<br>gDNA: 100 fg<br>Fecal samples from taemiasis carriers: 97% sensitivity; 100% specificity | T.sol                                                            | [20] |
| mtDNA       | Valine tRNA and NADH                           | Multiplex PCR                                              | Feces:10 eggs                                                                                                                 | T.sag-T.asia -T.sol                                              | [21] |
| mtDNA, nDNA | CO1, CLP (cathepsin L-like cysteine peptidase) | LAMP (Loop-mediated isothermal amplification)<br>LAMP/RFLP | 1 copy of the genes<br>Feces: 5eggs/g                                                                                         | T.sol-T.sag-T.asia                                               | [22] |
| nDNA        | HDP2                                           | Multiplex PCR                                              | gDNA:5-10 ng                                                                                                                  | T.sol-T.sag-T.asia                                               | [23] |
| nDNA        | Ag2                                            | PCR/Sequencing                                             | gDNA: 100 ng                                                                                                                  | T.sol genotypes                                                  | [24] |
| rDNA        | ITS1/FAM and Quasar probes                     | Real time PCR                                              | gDNA:.,T sol > 1 fg;<br>T.sag > 2.5 fg,<br>Fecal samples from taemiasis carriers: 82.7% sensitivity<br>99.0% specificity      | T.sag-T.sol                                                      | [25] |
| mt DNA      | CO1                                            | Pyrosequencing                                             | Proglottid, scolex                                                                                                            | T.sag-T.asia -T.sol                                              | [26] |
| mt DNA      | 12S, Nad5, Cox1, Nad1                          | PCR/sequencing                                             | Cyst fluids, CSF, proglottids.<br>Detection limit:<br>T.sag (Cox1, 1 pg; 12S, 100fg);<br>E.gra (Nad5, 100 pg; 12S, 10 pg;)    | <i>Taenia</i> sp and <i>Echinococcus</i> sp diagnosis and typing | [27] |

**Additional file 1: Table S1. DNA markers and molecular protocols used to identify the taeniid species involved in human taeniasis.**

|                |                                                                                         |                          | Specificity: cross-amplifications |                                                                   |      |
|----------------|-----------------------------------------------------------------------------------------|--------------------------|-----------------------------------|-------------------------------------------------------------------|------|
| mit RNA        | small (rrnS) and large (rrnL) subunits                                                  | Dual PCR                 | 1 pg of <i>Echinococcus</i> gDNA  | <i>Taenia</i> sp, <i>Echinococcus</i> sp,<br>Diagnosis and typing | [28] |
| rDNA<br>mitDNA | ITS1( <i>T.sol</i> )/Cy5 probe<br>CO1( <i>T.sag</i> ;<br><i>T.asia</i> )/HEX;FAM probes | Triplex Taq-Man (T3qPCR) | --                                | ITS1: <i>T.sol</i><br><br>CO1: <i>T.sag</i> - <i>T.asia</i>       | [29] |
