# Supplementary material for: HDP2: a ribosomal DNA (NTS-ETS) sequence as a target for species-specific molecular diagnosis of intestinal taeniasis in humans
Source: PubMed Central journal article supplement (PMC6389257; doi:10.1186/s13071-018-2646-6), 2018-02-27
Supplement: 13071_2018_2646_MOESM2_ESM.pdf [file 13071_2018_2646_MOESM2_ESM.pdf]

**Additional file 2: Table S2. References included in Additional file 1: Table S1.**

1. Rishi AK, McManus DP. DNA probes which unambiguously distinguish *Taenia solium* from *T. saginata*. *Lancet*. 1987;2:1275-6.
2. Rishi AK, McManus DP. Molecular cloning of *Taenia solium* genomic DNA and characterization of taeniid cestodes by DNA analysis. *Parasitology*. 1988;97:161-76.
3. Harrison LJ, Delgado J, Parkhouse RM. Differential diagnosis of *Taenia saginata* and *Taenia solium* with DNA probes. *Parasitology*. 1990;100:459-61.
4. Zarlenga DS, McManus DP, Fan PC, Cross JH. Characterization and detection of a newly described Asian taeniid using cloned ribosomal DNA fragments and sequence amplification by the polymerase chain reaction. *Exp Parasitol*. 1991;72:174-83.
5. Bowles J, McManus DP. Genetic characterization of the Asian *Taenia*, a newly described taeniid cestode of humans. *Am J Trop Med Hyg*. 1994;50:33-44.
6. Chapman A, Vallejo V, Mossie KG, Ortiz D, Agabian N, Flisser A. Isolation and characterization of species-specific DNA probes from *Taenia solium* and *Taenia saginata* and their use in an egg detection assay. *J Clin Microbiol*. 1995;33:1283-8.
7. von Nickisch-Roseneck M, Silva-Gonzalez R, Lucius R. Modification of universal 12S rDNA primers for specific amplification of contaminated *Taenia* spp. (Cestoda) gDNA enabling phylogenetic studies. *Parasitol Res*. 1999;85:819-25.
8. González LM, Montero E, Harrison LJ, Parkhouse RM, Garate T. Differential diagnosis of *Taenia saginata* and *Taenia solium* infection by PCR. *J Clin Microbiol*. 2000;38:737-44.
9. González LM, Montero E, Sciutto E, Harrison LJ, Parkhouse RM, Garate T. Differential diagnosis of *Taenia saginata* and *Taenia solium* infections: from DNA probes to polymerase chain reaction. *Trans R Soc Trop Med Hyg*. 2002;96 Suppl. 1:S243-S250.
10. Mayta H, Talley A, Gilman RH, Jimenez J, Verastegui M, Ruiz M, Garcia HH, Gonzalez AE. Differentiating *Taenia solium* and *Taenia saginata* infections by simple hematoxylin-eosin staining and PCR-restriction enzyme analysis. *J Clin Microbiol*. 2000;38:133-7.
11. Okamoto M, Nakao M, Sako Y, Ito A. Molecular variation of *Taenia solium* in the world. *Southeast Asian J Trop Med Public Health*. 2001;32 Suppl 2:90-3.
12. Nakao M, Okamoto M, Sako Y, Yamasaki H, Nakaya K, Ito A. A phylogenetic hypothesis for the distribution of two genotypes of the pig tapeworm *Taenia solium* worldwide. *Parasitology*. 2002;124:657-62.
13. Yamasaki H, Nakao M, Sako Y, Nakaya K, Sato MO, Mamuti W, Okamoto M, Ito A. DNA differential diagnosis of human taeniid cestodes by base excision sequence scanning thymine-base reader analysis with mitochondrial genes. *J Clin Microbiol*. 2002;40:3818-21.
14. Rodriguez-Hidalgo R, Geysen D, Benítez-Ortiz W, Geerts S, Brandt J. Comparison of conventional techniques to differentiate between *Taenia solium* and *Taenia saginata* and an improved polymerase chain reaction-restriction fragment length polymorphism assay using a mitochondrial 12S rDNA fragment. *J Parasitol*. 2002;88:1007-11.
15. Margono SS, Ito A, Sato MO, Okamoto M, Subahar R, Yamasaki H, Hamid A, Wandra T, Purba WH, Nakaya K, Ito M, Craig PS, Suroso T. *Taenia solium* taeniasis/cysticercosis in Papua, Indonesia in 2001: detection of human worm carriers. *J Helminthol*. 2003;77:39-42.

16. Nunes CM, Lima LG, Manoel CS, Pereira RN, Nakano MM, Garcia JF. *Taenia saginata*: polymerase chain reaction for taeniasis diagnosis in human fecal samples. *Exp Parasitol*. 2003;104:67-9.
17. González LM, Montero E, Morakote N, Puente S, Díaz De Tuesta JL, Serra T, López-Velez R, McManus DP, Harrison LJ, Parkhouse RM, Gárate T. Differential diagnosis of *Taenia saginata* and *Taenia saginata asiatica* taeniasis through PCR. *Diagn Microbiol Infect Dis*. 2004;49:183-8.
18. Yamasaki H, Allan JC, Sato MO, Nakao M, Sako Y, Nakaya K, Qiu D, Mamuti W, Craig PS, Ito A. DNA differential diagnosis of taeniasis and cysticercosis by multiplex PCR. *J Clin Microbiol*. 2004;42:548-53.
19. Nunes CM, Dias AK, Dias FE, Aoki SM, de Paula HB, Lima LG, Garcia JF. *Taenia saginata*: differential diagnosis of human taeniasis by polymerase chain reaction-restriction fragment length polymorphism assay. *Exp Parasitol*. 2005;110:412-5.
20. Mayta H, Gilman RH, Prendergast E, Castillo JP, Tinoco YO, Garcia HH, Gonzalez AE, Sterling CR; Cysticercosis Working Group in Peru. Nested PCR for specific diagnosis of *Taenia solium* taeniasis. *J Clin Microbiol*. 2008;46:286-89.
21. Jeon HK, Chai JY, Kong Y, Waikagul J, Insisiengmay B, Rim HJ, Eom KS. Differential diagnosis of *Taenia asiatica* using multiplex PCR. *Exp Parasitol*. 2009;121:151-56.
22. Nkouawa A, Sako Y, Nakao M, Nakaya K, Ito A. Loop-mediated isothermal amplification method for differentiation and rapid detection of *Taenia* species. *J Clin Microbiol*. 2009;47:168-74.
23. González LM, Bailo B, Ferrer E, García MD, Harrison LJ, Parkhouse MR, McManus DP, Gárate T. Characterization of the *Taenia* spp HDP2 sequence and development of a novel PCR-based assay for discrimination of *Taenia saginata* from *Taenia asiatica*. *Parasit Vectors*. 2010;3:51.
24. Sato MO, Sako Y, Nakao M, Wandra T, Nakaya K, Yanagida T, Ito A. A possible nuclear DNA marker to differentiate the two geographic genotypes of *Taenia solium* tapeworms. *Parasitol Int*. 2011;60:108-10.
25. Praet N, Verweij JJ, Mwape KE, Phiri IK, Muma JB, Zulu G, van Lieshout L, Rodriguez-Hidalgo R, Benitez-Ortiz W, Dorny P, Gabriël S. Bayesian modelling to estimate the test characteristics of coprology, coproantigen ELISA and a novel real-time PCR for the diagnosis of taeniasis. *Trop Med Int Health*. 2013;18:608-14.
26. Thanchomnang T, Tantrawatpan C, Intapan PM, Sanpool O, Janwan P, Lulitanond V, Tourtip S, Yamasaki H, Maleewong W. Rapid molecular identification of human taeniid cestodes by pyrosequencing approach. *PLoS One*. 2014;9:e100611.
27. Roelfsema JH, Nozari N, Pinelli E, Kortbeek LM. Novel PCRs for differential diagnosis of cestodes. *Exp Parasitol*. 2016;161:20-6.
28. Boubaker G, Marinova I, Gori F, Hizem A, Müller N, Casulli A, Jerez Puebla LE, Babba H, Gottstein B, Spiliotis M. A dual PCR-based sequencing approach for the identification and discrimination of *Echinococcus* and *Taenia* taxa. *Mol Cell Probes*. 2016;30:211-7.
29. Ng-Nguyen D, Stevenson MA, Dorny P, Gabriël S, Vo TV, Nguyen VT, Phan TV, Hii SF, Traub RJ. Comparison of a new multiplex real-time PCR with the Kato Katz thick smear and copro-antigen ELISA for the detection and differentiation of *Taenia* spp. in human stools. *PLoS Negl Trop Dis*. 2017;11:e0005743.
