# Supplementary material for: HDP2: a ribosomal DNA (NTS-ETS) sequence as a target for species-specific molecular diagnosis of intestinal taeniasis in humans
Source: PubMed Central journal article supplement (PMC6389257; doi:10.1186/s13071-018-2646-6), 2018-02-27
Supplement: 13071_2018_2646_MOESM3_ESM.pdf [file 13071_2018_2646_MOESM3_ESM.pdf]

Additional file 3: Table S3. Universal and walking primers used for *T. solium* HDP2 sequencing.

| Name           | Sequence (5' - 3')                           |
|----------------|----------------------------------------------|
| pBluescript KS | TCGAGGTCGACGGTATC                            |
| pBluescript SK | GATCCACTAGTTCTAGAGCG                         |
| T3             | AATTAACCCTCACTAAAGGG                         |
| T7             | TAATACGACTCACTATAGGG                         |
| SP6            | TATTTAGGTGACACTATAG                          |
| 1.1F           | ACATTCCAAAGTGATAAATGAATAGCAAACAGTTTTTTGC     |
| 1.1R           | TTAAAGAGAAATTAGTGACTATTAAGTGGATACCAAAGGGAGGT |
| 1.1WP1F        | CGAGTGCGTGCACATAAAGCATGT                     |
| 1.1WP1R        | ATGTATTCCACCCCCCGTACTATG                     |
| 1.2F           | GTCCTCTGCTGGGCAGAAAAGAAA                     |
| 1.2R           | ATGTATTCCACCCCCCGTACTATG                     |
| WP1.2F         | AGCATGTAGGCTACGCTGTTCGTA                     |
| WP1.2R         | GTCGAAGCAAGAAGTGCAAGAAGTGTTTG                |
| 6.1F           | GAACACGAGGGCGAGGGAGAT                        |
| 6.1WP2         | GTTCGAACAAACAAAGTATTACACAGCCCCTC             |
| 28SA           | AGCCCAGCGCCGAAGCCTGCGGC                      |
| 28SB           | CTAGAGTCGGGGTGTTTGTGAATGC                    |
| 28SC           | CTGTCTATCTGACCTCGGATCAGT                     |
| 18SA           | GCCAGCTAGATGAGGCGCTGAAGAAGGAGG               |
| 18SB           | GTGAGCAGGAAACACTTTCTCATTA                    |
| 18SC           | GAGCAGGATAAAATCCATCGAAGTCGGATCCA             |
